# Supplementary material for: Changes in Reported Symptoms Attributed to Office Environments in Sweden between 1995 and 2020
Source: MDPI journal article supplement (doi:10.3390/ijerph191811434), 2022-09-11
Supplement: s1 [file s1]

|                                      |            | Year-group  |             |           |             |           |             |           |            |           |
|--------------------------------------|------------|-------------|-------------|-----------|-------------|-----------|-------------|-----------|------------|-----------|
| Symptom                              |            | 1995-1999   | 2000-2004   |           | 2005-2009   |           | 2010-2014   |           | 2015-2020  |           |
| Fatigue                              | count (%)  | 1023 (25.9) | 1552 (29.7) |           | 2076 (28.7) |           | 2744 (30.9) |           | 281 (35.7) |           |
|                                      | OR 95%(CI) | 1           | 1.21        | 1.10-1.32 | 1.15        | 1.06-1.26 | 1.28        | 1.18-1.40 | 1.59       | 1.35-1.87 |
| If yes often:                        | count (%)  | 697 (68.1)  | 913 (58.8)  |           | 1006 (48.5) |           | 1334 (48.6) |           | 141 (50.2) |           |
| cause is work environment            | OR         | 1           | 0.58        | 0.48-0.71 | 0.32        | 0.27-0.39 | 0.33        | 0.28-0.40 | 0.35       | 0.26-0.46 |
| Heavy-feeling head                   | count (%)  | 575 (14.7)  | 832 (16.1)  |           | 1070 (14.9) |           | 1533 (17.4) |           | 167 (21.3) |           |
|                                      | OR         | 1           | 1.11        | 0.99-1.25 | 1.02        | 0.91-1.14 | 1.22        | 1.10-1.36 | 1.58       | 1.30-1.91 |
| If yes often:                        | count (%)  | 472 (82.1)  | 638 (76.7)  |           | 720 (67.3)  |           | 1029 (67.1) |           | 114 (68.2) |           |
| cause is work environment            | OR         | 1           | 0.55        | 0.38-0.80 | 0.25        | 0.18-0.35 | 0.27        | 0.19-0.37 | 0.26       | 0.16-0.41 |
| Headache                             | count (%)  | 396 (10.1)  | 564 (10.9)  |           | 773 (10.7)  |           | 1072 (12.2) |           | 131 (16.8) |           |
|                                      | OR         | 1           | 1.09        | 0.95-1.25 | 1.07        | 0.94-1.22 | 1.23        | 1.09-1.39 | 1.79       | 1.45-2.22 |
| If yes often:                        | count (%)  | 295 (74.5)  | 392 (69.5)  |           | 457 (59.1)  |           | 656 (61.2)  |           | 79 (60.3)  |           |
| cause is work environment            | OR         | 1           | 0.62        | 0.42-0.91 | 0.27        | 0.19-0.39 | 0.32        | 0.22-0.44 | 0.30       | 0.18-0.48 |
| Nausea/dizziness                     | count (%)  | 89 (2.3)    | 108 (2.1)   |           | 126 (1.8)   |           | 171 (1.9)   |           | 15 (1.9)   |           |
|                                      | OR         | 1           | 0.91        | 0.69-1.21 | 0.76        | 0.58-1.01 | 0.85        | 0.65-1.10 | 0.84       | 0.48-1.46 |
| If yes often:                        | count (%)  | 51 (57.3)   | 58 (53.7)   |           | 40 (31.7)   |           | 71 (41.5)   |           | 9 (60.0)   |           |
| cause is work environment            | OR         | 1           | 0.73        | 0.38-1.38 | 0.25        | 0.14-0.48 | 0.40        | 0.22-0.72 | 0.81       | 0.25-2.69 |
| Difficulties concentrating           | count (%)  | 167 (4.3)   | 313 (6.1)   |           | 419 (5.9)   |           | 666 (7.6)   |           | 71 (9.1)   |           |
|                                      | OR         | 1           | 1.44        | 1.18-1.74 | 1.38        | 1.15-1.66 | 1.82        | 1.53-2.16 | 2.23       | 1.67-2.97 |
| If yes often:                        | count (%)  | 123 (73.7)  | 231 (73.8)  |           | 293 (70.0)  |           | 444 (66.7)  |           | 45 (63.3)  |           |
| cause is work environment            | OR         | 1           | 0.88        | 0.51-1.52 | 0.67        | 0.40-1.11 | 0.56        | 0.34-0.90 | 0.44       | 0.22-0.89 |
| Itch, singe, irritation in eyes      | count (%)  | 535 (13.6)  | 787 (15.1)  |           | 1035 (14.4) |           | 1444 (16.3) |           | 170 (21.9) |           |
|                                      | OR         | 1           | 1.13        | 1.01-1.27 | 1.06        | 0.95-1.19 | 1.24        | 1.11-1.38 | 1.78       | 1.47-2.16 |
| If yes often:                        | count (%)  | 443 (82.8)  | 635 (80.7)  |           | 763 (73.7)  |           | 1073 (74.3) |           | 124 (72.9) |           |
| cause is work environment            | OR         | 1           | 0.52        | 0.31-0.85 | 0.21        | 0.13-0.32 | 0.23        | 0.15-0.36 | 0.23       | 0.13-0.41 |
| Irritation, congestion or runny nose | count (%)  | 506 (12.9)  | 753 (14.5)  |           | 982 (13.6)  |           | 1347 (15.2) |           | 148 (19.0) |           |
|                                      | OR         | 1           | 1.14        | 1.01-1.29 | 1.06        | 0.95-1.19 | 1.21        | 1.08-1.35 | 1.58       | 1.29-1.94 |
| If yes often:                        | count (%)  | 365 (72.1)  | 491 (65.2)  |           | 531 (54.1)  |           | 757 (56.2)  |           | 77 (52.1)  |           |
| cause is work environment            | OR         | 1           | 0.56        | 0.40-0.78 | 0.25        | 0.18-0.34 | 0.27        | 0.20-0.37 | 0.25       | 0.16-0.39 |
| Hoarseness/dry throat                | count (%)  | 438 (11.2)  | 582 (11.2)  |           | 632 (8.8)   |           | 874 (9.9)   |           | 77 (9.8)   |           |
|                                      | OR         | 1           | 1.01        | 0.88-1.15 | 0.76        | 0.67-0.87 | 0.87        | 0.77-0.99 | 0.87       | 0.67-1.12 |
| If yes often:                        | count (%)  | 363 (82.9)  | 458 (78.7)  |           | 422 (66.8)  |           | 599 (68.5)  |           | 43 (55.8)  |           |
| cause is work environment            | OR         | 1           | 0.33        | 0.18-0.59 | 0.12        | 0.07-0.21 | 0.14        | 0.08-0.23 | 0.07       | 0.04-0.15 |
| Cough                                | count (%)  | 189 (4.9)   | 308 (5.9)   |           | 394 (5.5)   |           | 601 (6.8)   |           | 49 (6.3)   |           |
|                                      | OR         | 1           | 1.24        | 1.03-1.49 | 1.13        | 0.95-1.36 | 1.43        | 1.21-1.69 | 1.31       | 0.95-1.82 |
| If yes often:                        | count (%)  | 133 (70.4)  | 189 (61.4)  |           | 199 (50.5)  |           | 356 (59.2)  |           | 19 (38.8)  |           |
| cause is work environment            | OR         | 1           | 0.52        | 0.32-0.86 | 0.27        | 0.17-0.42 | 0.38        | 0.24-0.60 | 0.16       | 0.07-0.32 |
| Dry/red skin on face                 | count (%)  | 430 (11.0)  | 579 (11.2)  |           | 627 (8.7)   |           | 873 (9.9)   |           | 94 (12.0)  |           |
|                                      | OR         | 1           | 1.02        | 0.89-1.17 | 0.77        | 0.68-0.88 | 0.89        | 0.79-1.00 | 1.11       | 0.88-1.41 |
| If yes often:                        | count (%)  | 332 (77.2)  | 406 (70.1)  |           | 359 (57.3)  |           | 446 (51.1)  |           | 51 (54.3)  |           |
| cause is work environment            | OR         | 1           | 0.60        | 0.41-0.90 | 0.21        | 0.14-0.29 | 0.17        | 0.12-0.23 | 0.19       | 0.11-0.33 |
| Scaly or itchy ears or scalp         | count (%)  | 288 (7.4)   | 396 (7.7)   |           | 489 (6.8)   |           | 700 (7.9)   |           | 64 (8.3)   |           |
|                                      | OR         | 1           | 1.04        | 0.89-1.22 | 0.92        | 0.79-1.06 | 1.08        | 0.94-1.24 | 1.13       | 0.85-1.50 |
| If yes often:                        | count (%)  | 148 (51.4)  | 171 (43.2)  |           | 139 (28.4)  |           | 200 (28.6)  |           | 27 (42.2)  |           |
| cause is work environment            | OR         | 1           | 0.51        | 0.36-0.73 | 0.21        | 0.15-0.30 | 0.21        | 0.15-0.29 | 0.36       | 0.20-0.64 |
| Dry, itchy or red skin on hands      | count (%)  | 318 (8.2)   | 436 (8.4)   |           | 550 (7.7)   |           | 810 (9.2)   |           | 105 (13.5) |           |
|                                      | OR         | 1           | 1.04        | 0.89-1.21 | 0.94        | 0.81-1.08 | 1.14        | 1.00-1.31 | 1.76       | 1.39-2.22 |
| If yes often:                        | count (%)  | 208 (65.4)  | 239 (54.8)  |           | 218 (39.6)  |           | 319 (39.4)  |           | 49 (46.7)  |           |
| cause is work environment            | OR         | 1           | 0.61        | 0.42-0.87 | 0.22        | 0.16-0.31 | 0.23        | 0.17-0.31 | 0.28       | 0.17-0.46 |
